# Supplementary material for: Potential Impact of Climate Change and Extreme Events on Slope Land Hazard – A Case Study of Xindian Watershed in Taiwan
Source: Copernicus journal article supplement (doi:10.5194/nhess-2018-125), 2018-05-30
Supplement: Supplementary file [file nhess-2018-125-AC2-supplement.pdf]

# Supplement of TRIGRS input parameters

**Table S1 The parameters used in TRIGRS**

| Geologic Time     | Name (abbr.)                    | $\gamma_s$ (kN/m <sup>3</sup> ) | C (kPa)   | $\phi$ (°) | K (10 <sup>-6</sup> m/s) | D (10 <sup>-6</sup> m <sup>2</sup> /s) | Description (Ref: Central Geological Survey in Taiwan)                                                                                        |
|-------------------|---------------------------------|---------------------------------|-----------|------------|--------------------------|----------------------------------------|-----------------------------------------------------------------------------------------------------------------------------------------------|
| Holocene          | Alluvium (a)                    | 19.5                            | 10.5      | 34         | 29                       | 8800                                   | Gravel, sand, and mud                                                                                                                         |
|                   | Terrace Deposits (t)            | 23                              | 6.5       | 30         | 0.7                      | 220                                    | Gravel, sand and clay                                                                                                                         |
| Pleistocene       | Lateritic Terrace Deposits (lt) | 18.6                            | 35        | 30         | 0.8                      | 800                                    | Red earth, lateritic gravel, sand, intercalated with sand and silt lentils                                                                    |
| Miocene           | Mushan Formation (Ms)           | 27.5                            | 16.8-28.8 | 32.0-36.0  | 10                       | 2000                                   | Alternations of sandstone and shale, intercalated with coal seams                                                                             |
|                   | Nanchuang Formation (Nc)        | 27.5                            | 23.5      | 34.5       | 10                       | 2000                                   | Alternations of sandstone and shale, intercalated with coal seams                                                                             |
|                   | Nankang Formation (Nk)          | 27.5                            | 29        | 36         | 10                       | 2000                                   | Sandstone, siltstone, and shale                                                                                                               |
|                   | Piling Shale (Pi)               | 24.8                            | 19.9-27.4 | 32.0-35.0  | 10                       | 2000                                   | Shale with intercalated sandstone                                                                                                             |
|                   | Shihti Formation (St)           | 27.5                            | 24.1-30.1 | 32.0-34.0  | 10                       | 2000                                   | Alternations of sandstone and shale, intercalated with coal seams                                                                             |
|                   | Tapu Formation (Tp)             | 27.5                            | 20.9      | 34         | 10                       | 2000                                   | Alternations of muddy sandstone, white sandstone and shale                                                                                    |
|                   | Taliao Formation (Tl)           | 27.5                            | 16.3-27.3 | 32.0-36.0  | 10                       | 2000                                   | Shale and sandstone                                                                                                                           |
| Oligocene-Miocene | Wenshui Formation (Ws)          | 24.8                            | 16.4-28.9 | 32.0-36.0  | 10                       | 2000                                   | Sandstone and shale interbeds                                                                                                                 |
| Oligocene         | Kangkou Formation (Kk)          | 25.3                            | 20.6-33.1 | 26.0-31.5  | 20                       | 4000                                   | Argillite or slate intercalated with thin to thick-bedded siltstone                                                                           |
|                   | Shuichangliu Formation (Om)     | 27.5                            | 21.0-33.5 | 29.0-33.0  | 10                       | 2000                                   | Argillite, slate                                                                                                                              |
|                   | Tatungshan Formation (Tt)       | 27.5                            | 19.1-33.0 | 28.0-34.0  | 10                       | 2000                                   | Argillite intercalated with thin to thick-bedded siltstone and fine-grained sandstone                                                         |
|                   | Tsuku Formation (Tu)            | 25.3                            | 18.0-30.0 | 27.0-30.0  | 10                       | 1000                                   | Alternations of siltstone and argillite                                                                                                       |
| Eocene            | Chungling Formation (Cl)        | 25                              | 24.8-32.8 | 29         | 20                       | 4000                                   | Argillite or slate, with thin bedded metasandstone                                                                                            |
|                   | Hsitsun Formation (Ht)          | 25                              | 22.2-32.6 | 30.5-33.5  | 10                       | 2000                                   | Thin alternations of argillite and metasandstone                                                                                              |
|                   | Szeleng Sandstone (Em)          | 23.5                            | 18.1-32.0 | 28.0-32.0  | 10                       | 2000                                   | Thick-bedded party pebbly quartzitic sandstone, arkosic sandstone and thin alternations, with argillite and thin coal seams on the upper part |

## Supplement of relationship of slope and landslide depth

**Table S2 Relationship of slope and landslide depth (Chen et al., 2010)**

| Slope ( degree ) | Shimen watershed northern Taiwan (m) | Dajia watershed middle Taiwan (m) | Landslides triggered by Typhoon Aere in Shimen watershed northern Taiwan (m) | Average (m) | Classified Levels in Figure 8 (m) |
|------------------|--------------------------------------|-----------------------------------|------------------------------------------------------------------------------|-------------|-----------------------------------|
| <20              | 1.41                                 | 3.04                              | 0.32                                                                         | 1.59        | 1.5                               |
| 20~30            | 3.13                                 | 4.19                              | 2.82                                                                         | 3.38        | 3.5                               |
| 30~40            | 3.51                                 | 5.33                              | 4.27                                                                         | 4.37        | 4.5                               |
| 40~50            | 2.17                                 | 3.49                              | 1.98                                                                         | 2.55        | 2.5                               |
| >50              | 1.82                                 | 1.33                              | 0.20                                                                         | 1.12        | 1.0                               |

Chen S.C., Wu C.H., Wang Y.P. (2010) The Discussion of the Characteristic of Landslides Caused by Rainfall or Earthquake. Journal of Chinese Soil and Water Conservation, 41(2): 94-112. (in Chinese)

5

## Supplement of debris flow coverage area

**Table S3 Debris flow coverage area for different use**

| Land Use Type              | Scenario 1 (Square kilometer) | Scenario 2 (Square kilometer) |
|----------------------------|-------------------------------|-------------------------------|
| Transportation Loss        | 0.22                          | 0.25                          |
| Household Loss             | 0.09                          | 0.10                          |
| Publid Building Loss       | 0.03                          | 0.03                          |
| Forest Loss                | 44.35                         | 54.52                         |
| Hydraulic Facility Loss    | 1.70                          | 1.89                          |
| Industry and Commerce Loss | 0.07                          | 0.07                          |
| Agriculture Loss           | 0.45                          | 0.57                          |
